# Supplementary material
Source: publisher figshare collection journal article supplement (https://acs.figshare.com/ndownloader/files/26425829)
Supplement: Supplementary file 1 [file 26425829]

## Supporting Information

### **Engineering cationic sulfur-doped $\text{Co}_3\text{O}_4$ architectures with exposing high-reactive (112) facets for PEC water purification**

Yanwei Di<sup>1</sup>, Chun Ma<sup>1</sup>, Yinghuan Fu<sup>1</sup>, Xiaoli Dong<sup>1</sup>, Xinghui Liu<sup>2\*</sup>, Hongchao Ma<sup>1\*</sup>

1 School of Light Industry and Chemical Engineering, Dalian Polytechnic University, Ganjingzi District, Dalian 116034, P.R. China

2 Department of Chemistry, Sungkyunkwan University (SKKU), Jangan-Gu, Suwon 16419, Republic of Korea

**\*Corresponding Authors email:** Xinghui Liu: liuxinghui119@gmail.com; Hongchao Ma: m-h-c@sohu.com.

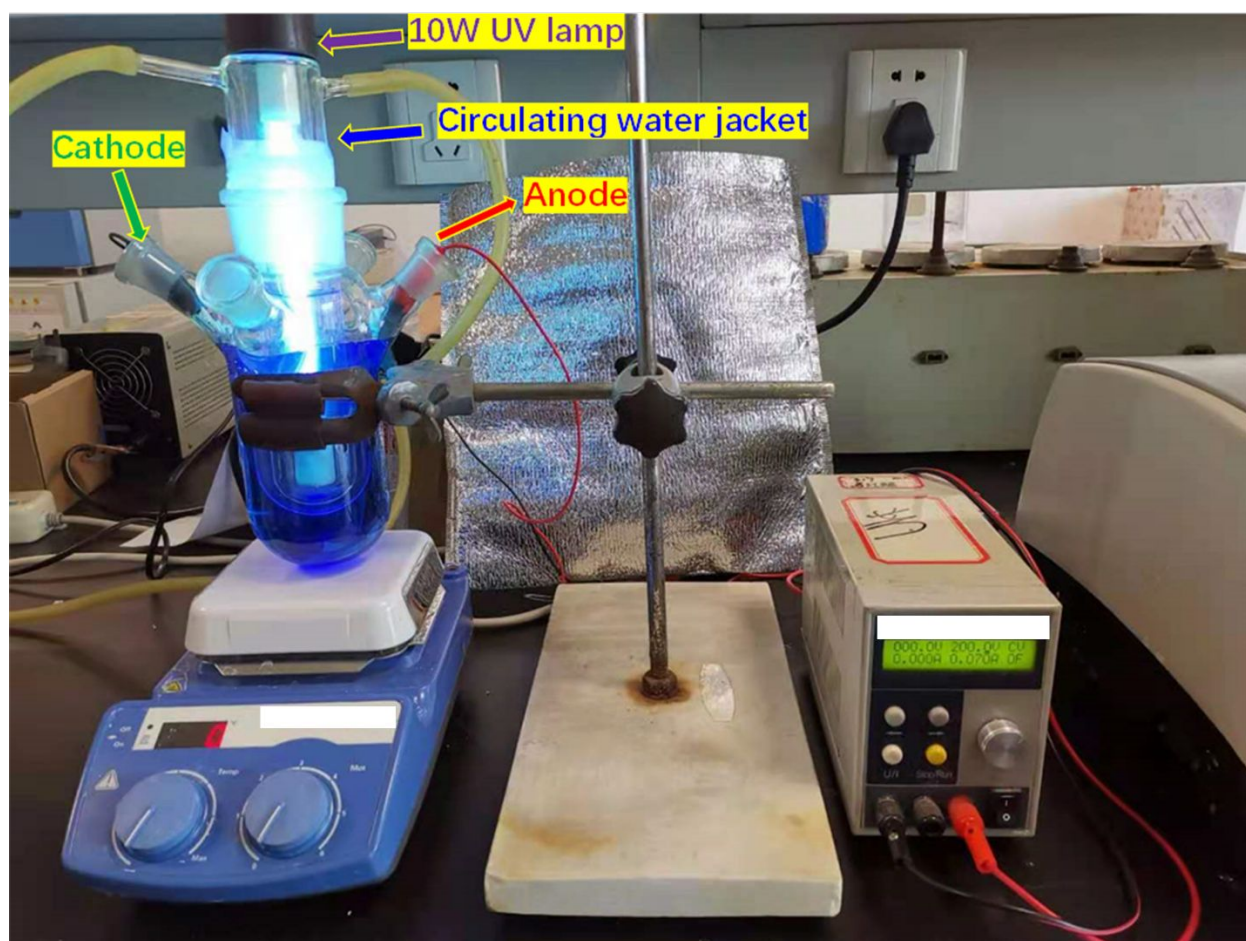

**Scheme S1.** The diagram of the reactor during the PEC process.

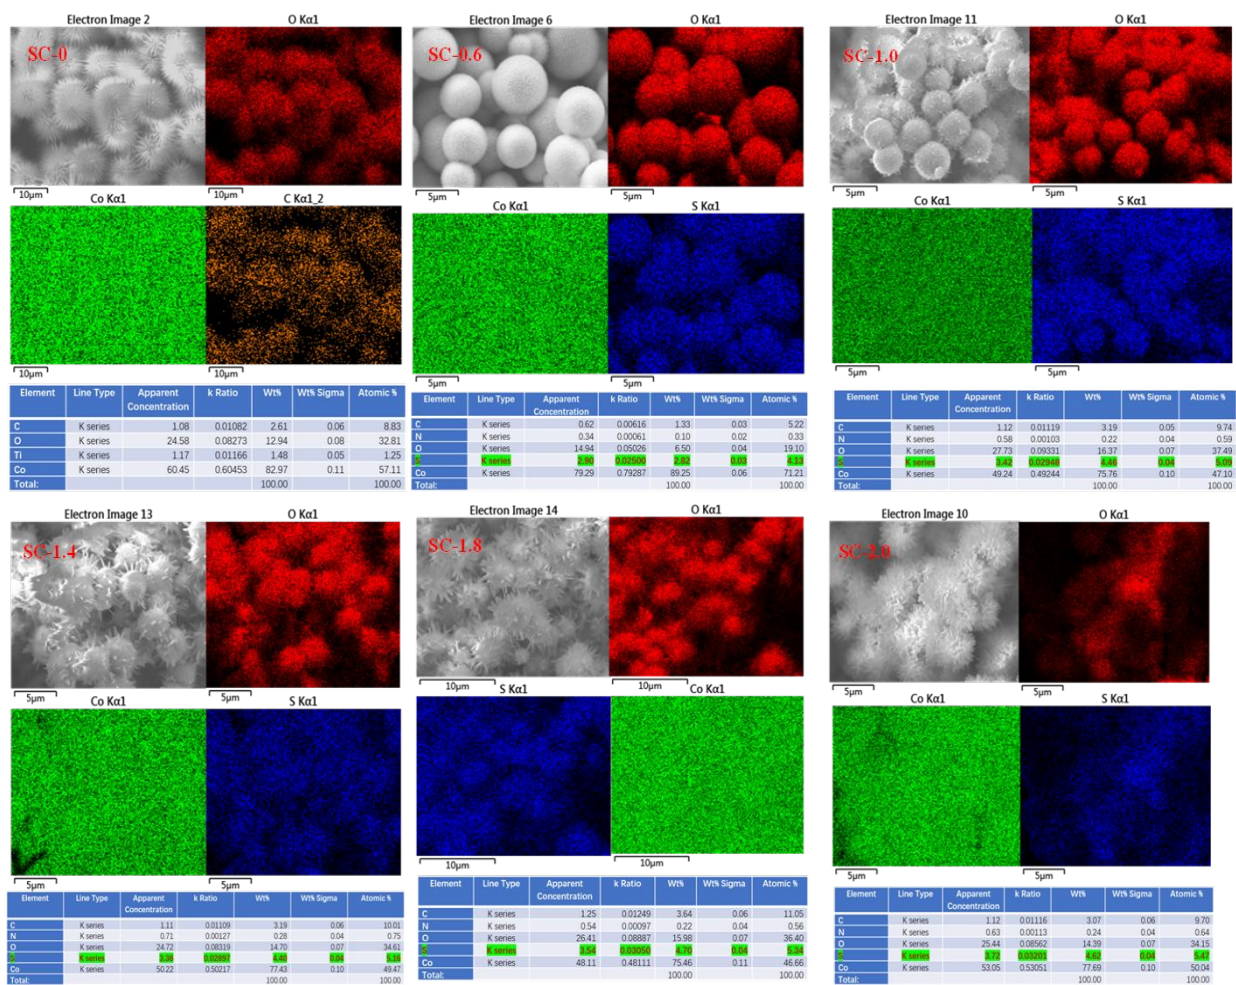

**Figure S1.** the EDS mapping analysis of Ti/Co<sub>3</sub>O<sub>4</sub> samples with or without L-cysteine modification.

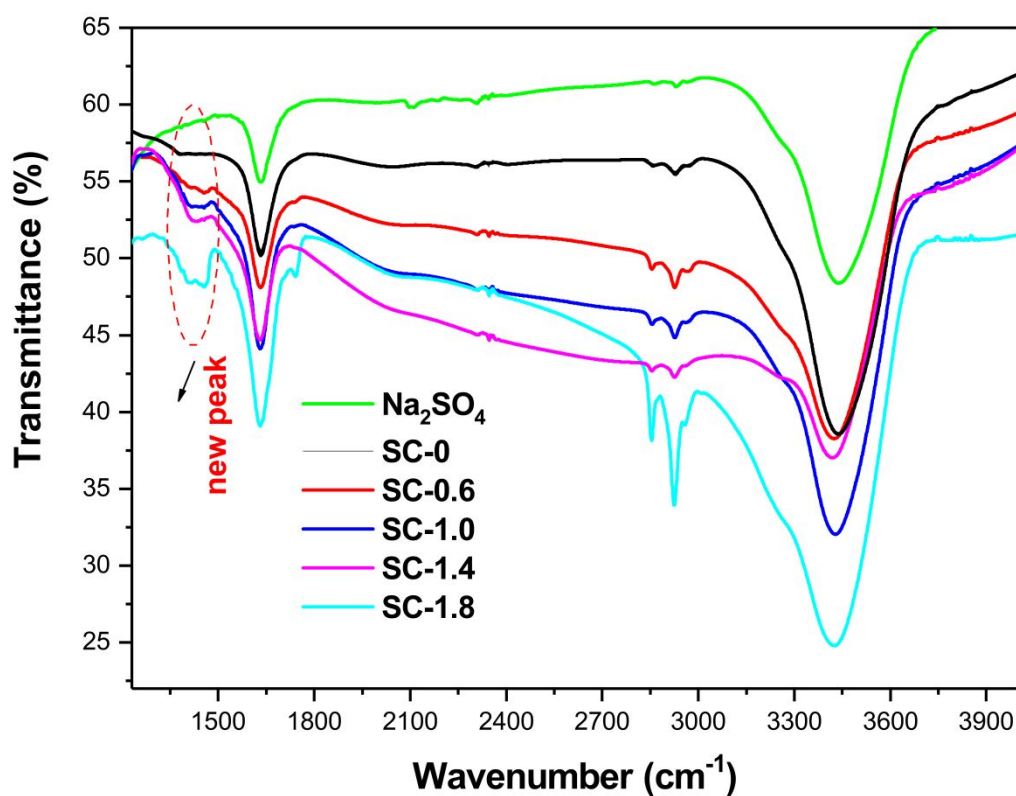

**Figure.S2.** FT-IR spectra of Ti/Co<sub>3</sub>O<sub>4</sub> reference and L-cysteine modified Ti/Co<sub>3</sub>O<sub>4</sub>.

Figure. S2 shows the results of FT-IR analysis. It was observed that a new peak at 1420-1450 cm<sup>-1</sup> was formed. The intensity of the new peak became stronger with enhancing S amount. The appearance of the peak at 1420-1450 cm<sup>-1</sup> is an indicative of a new interaction of Co–O–S<sup>6+</sup>.<sup>1-4</sup> To validate the XPS results, the FT-IR results also indicated that the doped S<sup>6+</sup> was incorporated into Co<sub>3</sub>O<sub>4</sub> lattice by replacing the Co ion after heat treatment, which is the evidence for proving the forming of the Co-O-S bonds.

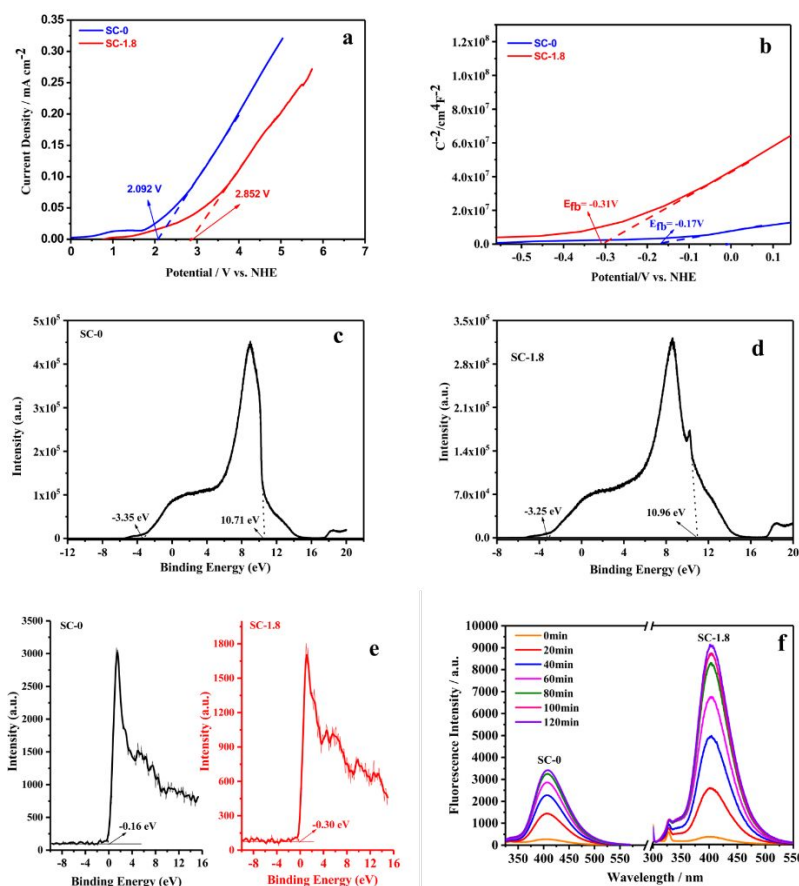

**Figure S3.** (a) Steady-state polarization curves of Ti/Co<sub>3</sub>O<sub>4</sub>-reference and L-cysteine-modified Ti/Co<sub>3</sub>O<sub>4</sub> electrode in a 0.1 mol L<sup>-1</sup> Na<sub>2</sub>SO<sub>4</sub> solution (the potential was swept from 0.0 to 6.0 V vs. SCE); (b) Mot-Schottky plots of Ti/Co<sub>3</sub>O<sub>4</sub>-reference and L-cysteine-modified Ti/Co<sub>3</sub>O<sub>4</sub> electrode; (c) UPS spectra (under -3.0 V bias) of the Ti/Co<sub>3</sub>O<sub>4</sub>-reference; (d) UPS spectra (under -3.0 V bias) of the L-cysteine modified Ti/Co<sub>3</sub>O<sub>4</sub>; (e) VB-XPS spectra of the Ti/Co<sub>3</sub>O<sub>4</sub>-reference and L-cysteine modified Ti/Co<sub>3</sub>O<sub>4</sub>; (f) Fluorescence spectra of Ti/Co<sub>3</sub>O<sub>4</sub>-reference and L-cysteine-modified Ti/Co<sub>3</sub>O<sub>4</sub> electrode during the photoelectrolysis of benzoic acid (200 mg L<sup>-1</sup> benzoic acid and 0.5 mol L<sup>-1</sup> Na<sub>2</sub>SO<sub>4</sub> as a supporting electrolyte).



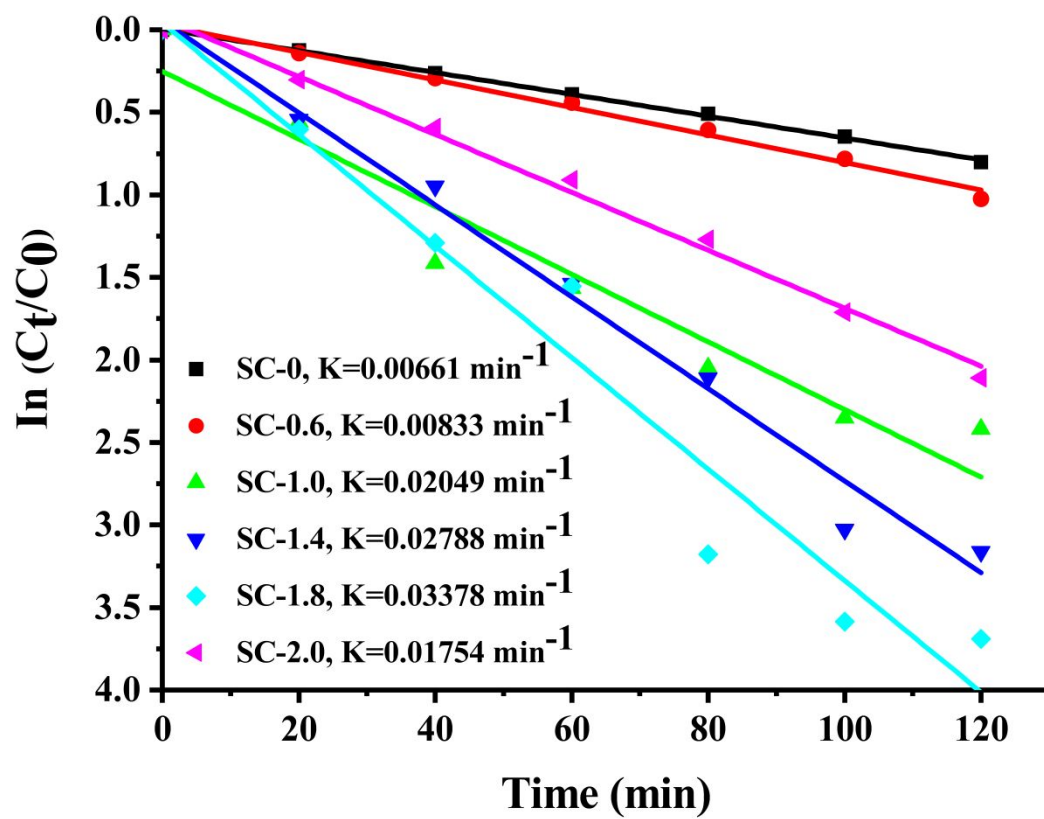

**Figure S4.** Kinetic analysis of the degradation of KN-R for the current electrodes.

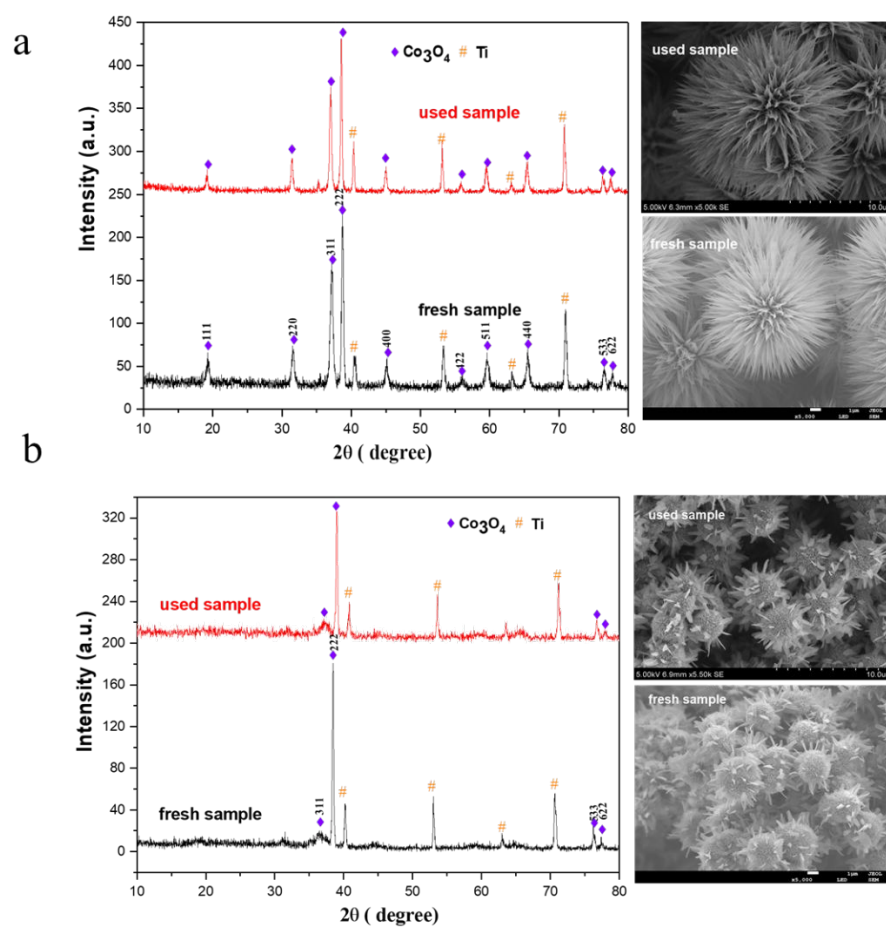

**Figure S5.** The XRD and SEM characterization for (a) Ti/Co<sub>3</sub>O<sub>4</sub> samples and (b) L-cysteine modified Ti/Co<sub>3</sub>O<sub>4</sub> samples before/after usage.

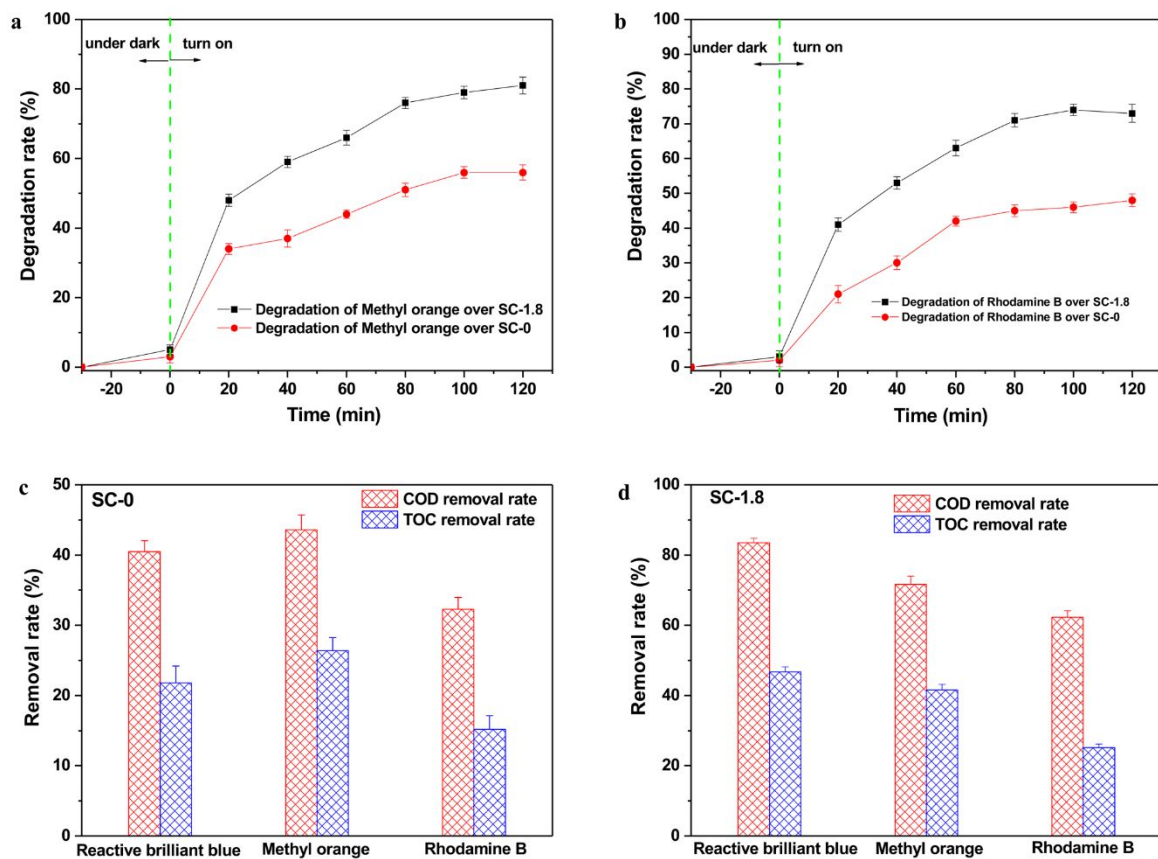

**Figures S6.** The analysis of the decolorization, COD and TOC for the degradation process of different pollutants over (a and c) for SC-0 and (b and d) for SC-1.8.



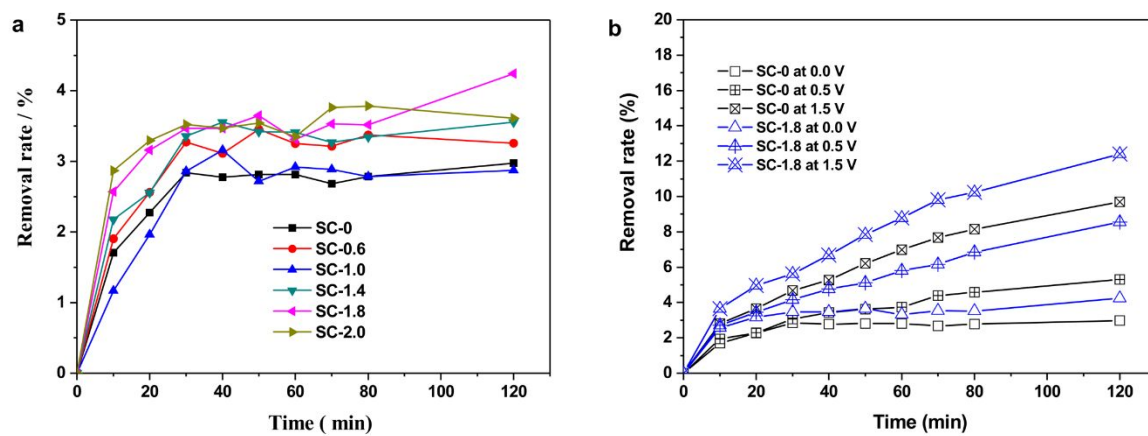

**Figures S7.** (a) absorption and (b) electrosorption removal of various electrodes.

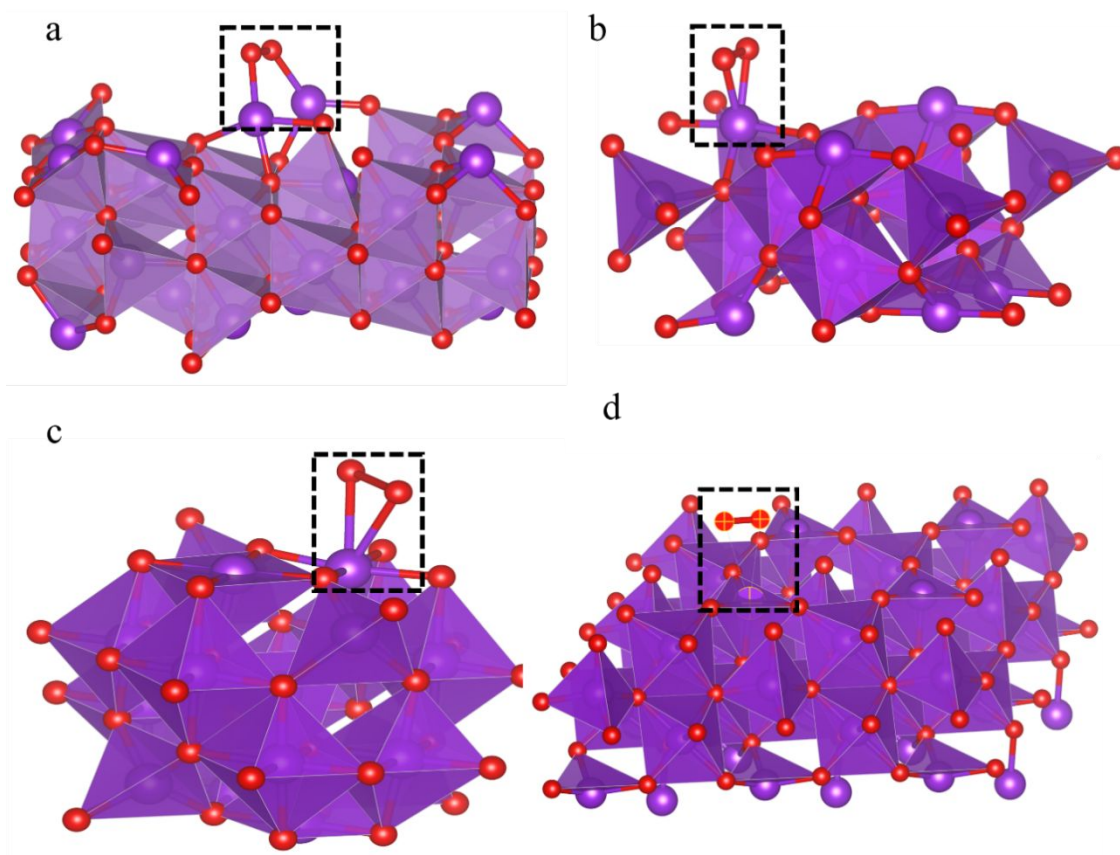

**Figure S8.** The DFT calculation-simulated interaction of  $\cdot\text{O}_2^-$  with Co site on the different facets:

(a) (112) facet, (b) (110) facet, (c) (001), (d) (111) facet.

## Reference:

1. Liu, S.; Chen, X., A visible light response TiO<sub>2</sub> photocatalyst realized by cationic S-doping and its application for phenol degradation. *J. Hazard. Mater.* **2008**, *152* (1), 48-55.
2. Han, C.; Pelaez, M.; Likodimos, V.; Kontos, A. G.; Falaras, P.; O'Shea, K.; Dionysiou, D. D., Innovative visible light-activated sulfur doped TiO<sub>2</sub> films for water treatment. *Appl Catal. B* **2011**, *107* (1), 77-87.
3. Chen, X.; Sun, H.; Zhang, J.; Guo, Y.; Kuo, D.-H., Cationic S-doped TiO<sub>2</sub>/SiO<sub>2</sub> visible-light photocatalyst synthesized by co-hydrolysis method and its application for organic degradation. *J. Mol. Liq.* **2019**, *273*, 50-57.
4. Nishikiori, H.; Hayashibe, M.; Fujii, T., Visible light-photocatalytic activity of sulfate-doped titanium dioxide prepared by the Sol–Gel method. *Catalysts* **2013**, *3* (2), 363-377.
